# Supplementary material
Source: MDPI journal article supplement (https://www.mdpi.com/2308-3417/5/4/77)
Supplement: s1 [file s1]

**Table S1.** Correlation between GAITRite parameters and functional balance tests in all patients.

|                           | Singe task |       |       |       | Dual task |       |       |       | Average<br>(absolute) |
|---------------------------|------------|-------|-------|-------|-----------|-------|-------|-------|-----------------------|
|                           | BBS        | DGI   | TUG   | STS   | BBS       | DGI   | TUG   | STS   |                       |
| Velocity                  | 0.55       | 0.64  | -0.67 | 0.37  | 0.64      | 0.61  | -0.73 | 0.42  | 0.58                  |
| Cadence                   | 0.52       | 0.60  | -0.48 | 0.38  | 0.52      | 0.57  | -0.47 | 0.30  | 0.48                  |
| Stride length             | 0.51       | 0.53  | -0.64 | 0.31  | 0.58      | 0.53  | -0.69 | 0.36  | 0.52                  |
| Swing time                | 0.51       | 0.45  | -0.51 | 0.26  | 0.60      | 0.47  | -0.62 | 0.38  | 0.48                  |
| Double-support time       | -0.48      | -0.41 | 0.49  | -0.22 | -0.59     | -0.47 | 0.58  | -0.35 | 0.45                  |
| Stride length variability | -0.56      | -0.47 | 0.62  | -0.33 | -0.31     | -0.07 | 0.15  | 0.13  | 0.33                  |
| Swing time viarability    | -0.36      | -0.44 | 0.41  | -0.18 | -0.50     | -0.52 | 0.49  | -0.31 | 0.40                  |

Abbreviations: BBS, Bergs Balance Scale; DGI, Dynamic Gait Index; TUG, Timed Up and Go; STS.

**Table S2.** Correlation between GAITRite parameters and functional balance tests in patients using walkers.

|                           | Single task |       |       |       | Dual task |       |       |       | Average<br>(absolute) |
|---------------------------|-------------|-------|-------|-------|-----------|-------|-------|-------|-----------------------|
|                           | BBS         | DGI   | TUG   | STS   | BBS       | DGI   | TUG   | STS   |                       |
| Velocity                  | 0.22        | 0.47  | -0.46 | 0.07  | -0.09     | 0.06  | -0.43 | 0.59  | 0.30                  |
| Cadence                   | 0.20        | 0.73  | 0.25  | 0.00  | 0.07      | 0.73  | 0.43  | -0.19 | 0.33                  |
| Stride length             | -0.02       | 0.22  | -0.57 | -0.04 | -0.07     | 0.09  | -0.61 | 0.37  | 0.25                  |
| Swing time                | 0.20        | 0.60  | -0.14 | -0.44 | 0.29      | 0.15  | -0.50 | 0.41  | 0.34                  |
| Double-support time       | -0.20       | -0.60 | 0.14  | 0.44  | -0.12     | -0.28 | 0.43  | -0.30 | 0.31                  |
| Stride length variability | -0.52       | 0.34  | 0.49  | 0.17  | 0.14      | 0.12  | -0.60 | 0.55  | 0.37                  |
| Swing time variability    | -0.06       | -0.31 | 0.49  | -0.09 | -0.05     | -0.49 | 0.26  | -0.46 | 0.28                  |

Abbreviations: BBS, Bergs Balance Scale; DGI, Dynamic Gait Index; TUG, Timed Up and Go; STS.

**Table S3.** Correlation between GAITRite parameters and functional balance tests in patients not using walkers.

|                           | Single task |       |       |       | Dual task |       |       |       | Average<br>(absolute) |
|---------------------------|-------------|-------|-------|-------|-----------|-------|-------|-------|-----------------------|
|                           | BBS         | DGI   | TUG   | STS   | BBS       | DGI   | TUG   | STS   |                       |
| Velocity                  | 0.64        | 0.47  | -0.61 | 0.33  | 0.75      | 0.51  | -0.69 | 0.36  | 0.55                  |
| Cadence                   | 0.55        | 0.39  | -0.48 | 0.37  | 0.55      | 0.39  | -0.48 | 0.24  | 0.43                  |
| Stride length             | 0.62        | 0.44  | -0.60 | 0.27  | 0.75      | 0.50  | -0.68 | 0.33  | 0.52                  |
| Swing time                | 0.65        | 0.49  | -0.67 | 0.45  | 0.76      | 0.54  | -0.74 | 0.45  | 0.59                  |
| Double-support time       | -0.63       | -0.42 | 0.64  | -0.40 | -0.71     | -0.48 | 0.69  | -0.40 | 0.50                  |
| Stride length variability | -0.44       | -0.33 | 0.38  | -0.14 | -0.57     | -0.25 | 0.46  | 0.14  | 0.34                  |
| Swing time variability    | -0.52       | -0.47 | 0.46  | -0.21 | -0.67     | -0.57 | 0.62  | -0.35 | 0.48                  |

Abbreviations: BBS, Bergs Balance Scale; DGI, Dynamic Gait Index; TUG, Timed Up and Go; STS.
